# Supplementary material for: Regioselective alkylation of a versatile indazole: Electrophile scope and mechanistic insights from density functional theory calculations
Source: Beilstein J Org Chem. 2024 Aug 9;20:1940–54. doi: 10.3762/bjoc.20.170 (PMC11318628; doi:10.3762/bjoc.20.170)
Supplement: File 3 — GoodVibes outputs. [file Beilstein_J_Org_Chem-20-1940-s003.xlsx]

## Sheet: Goodvibes_output_3CO2Me_Br_90Te
GoodVibes v3.2 2024/01/27 08:59:08
Citation: Luchini	G.; Alegre-Requena	J. V.; Funes-Ardoiz	I.; Paton	R. S. F1000Research	2020	9	291
GoodVibes version 3.2 DOI: 10.12688/f1000research.22758.1
o Requested: --imag -c 1 --spc sp -t 363.15 --pes BioCryst_pathways_cesium.yaml --csv
Temperature = 363.15 Kelvin Concentration = 1.0 mol/L
All energetic values below shown in Hartree unless otherwise specified.
x Caution! Different levels of theory found:
-PBE1PBE/def2SVP: ../indazole_deprot_neg_a.log	../indazole_deprot_neg_b.log	../product_indazole_1Me_neut_a.log	../product_indazole_1Me_neut_b.log	../product_indazole_2Me_neut_a.log	../product_indazole_2Me_neut_b.log	../rxt_indazole_1H_neut.log	../rxt_indazole_2H_neut.log	product_HCO3.log	product_OTs.log	rxt_MeOTs.log
-PBE1PBE/GenECP: indazole_1Me_Cs_1_pos_a.log	indazole_1Me_Cs_2_pos_b.log	indazole_2Me_Cs_O_pos_b.log	indazole_Cs_1_neut_a.log	indazole_Cs_1_neut_b.log	indazole_Cs_2_neut_a.log	indazole_Cs_2_neut_b.log	indazole_Cs_O_neut_a.log	product_CO3HCs.log	product_CsOTs.log	rxt_CO3Cs2.log	TS5A_E_1Me_OTs_b.log	TS5A_Z_1Me_OTs_b.log	TS5B_E_2Me_OTs_a.log	TS5B_Z_2Me_OTs_a.log
-PBE1PBE/def2TZVP: rxt_Cs_pos.log
Using vibrational scale factor 1.0: differing levels of theory detected.
Caution! Implicit solvation (SMD/CPCM) detected. Enthalpic and entropic terms cannot be safely separated. Use them at your own risk!
Entropic quasi-harmonic treatment: frequency cut-off value of 100.0 wavenumbers will be applied.
QS = Grimme: Using a mixture of RRHO and Free-rotor vibrational entropies.
REF: Grimme	S. Chem. Eur. J. 2012	18	9955-9964
Combining final single point energy with thermal corrections.
Structure	E_SPC	E	ZPE	H_SPC	T.S	T.qh-S	G(T)_SPC	qh-G(T)_SPC	im	freq
*******************************************************************************************************************************************************
o indazole_deprot_neg_a	-3180.08	-3179.1	0.138882	-3179.92	0.066024	0.064171	-3179.99	-3179.99
o indazole_deprot_neg_b	-3180.08	-3179.1	0.138831	-3179.92	0.066204	0.064253	-3179.99	-3179.99
o product_indazole_1Me_neut_a	-3219.85	-3218.83	0.180389	-3219.65	0.072185	0.069652	-3219.72	-3219.72
o product_indazole_1Me_neut_b	-3219.85	-3218.83	0.18038	-3219.65	0.07195	0.069544	-3219.72	-3219.71
o product_indazole_2Me_neut_a	-3219.84	-3218.83	0.180894	-3219.64	0.070562	0.068623	-3219.71	-3219.71
o product_indazole_2Me_neut_b	-3219.84	-3218.83	0.180803	-3219.64	0.070747	0.068769	-3219.71	-3219.71
o rxt_indazole_1H_neut	-3180.57	-3179.6	0.153056	-3180.4	0.066143	0.064418	-3180.46	-3180.46
o rxt_indazole_2H_neut	-3180.56	-3179.59	0.153099	-3180.39	0.066244	0.064453	-3180.46	-3180.46
o indazole_1Me_Cs_1_pos_a	-3239.94	-3238.93	0.181433	-3239.74	0.082669	0.077905	-3239.82	-3239.82
o indazole_1Me_Cs_2_pos_b	-3239.96	-3238.95	0.181368	-3239.75	0.082401	0.077811	-3239.83	-3239.83
o indazole_2Me_Cs_O_pos_b	-3239.94	-3238.94	0.181247	-3239.74	0.083492	0.078089	-3239.82	-3239.82
o indazole_Cs_1_neut_a	-3200.2	-3199.23	0.139726	-3200.04	0.077145	0.072887	-3200.12	-3200.12
o indazole_Cs_1_neut_b	-3200.2	-3199.23	0.139753	-3200.04	0.077056	0.072797	-3200.12	-3200.12
o indazole_Cs_2_neut_a	-3200.2	-3199.23	0.1396	-3200.04	0.077869	0.073161	-3200.12	-3200.12
o indazole_Cs_2_neut_b	-3200.21	-3199.24	0.139772	-3200.05	0.076615	0.072599	-3200.12	-3200.12
o indazole_Cs_O_neut_a	-3200.2	-3199.22	0.139582	-3200.04	0.076457	0.072477	-3200.11	-3200.11
o product_CO3HCs	-284.507	-284.194	0.028074	-284.471	0.045312	0.044472	-284.516	-284.515
o product_CsOTs	-914.639	-913.888	0.132022	-914.489	0.071956	0.066707	-914.561	-914.556
o product_HCO3	-264.374	-264.045	0.026942	-264.341	0.034327	0.034328	-264.376	-264.376
o product_OTs	-894.514	-893.745	0.131662	-894.367	0.059422	0.057135	-894.427	-894.425
o rxt_CO3Cs2	-304.116	-303.806	0.016225	-304.089	0.05436	0.052431	-304.143	-304.141
o rxt_Cs_pos	-20.0974	-20.0974	0	-20.0945	0.020139	0.020139	-20.1147	-20.1147
o rxt_MeOTs	-934.236	-933.442	0.171708	-934.046	0.065818	0.063053	-934.111	-934.109
o TS5A_E_1Me_OTs_b	-4134.42	-4132.67	0.311292	-4134.07	0.124271	0.111906	-4134.2	-4134.18	-626.63
o TS5A_Z_1Me_OTs_b	-4134.42	-4132.66	0.31127	-4134.07	0.123555	0.111537	-4134.19	-4134.18	-625.71
o TS5B_E_2Me_OTs_a	-4134.42	-4132.66	0.311135	-4134.07	0.124251	0.111917	-4134.19	-4134.18	-605.52
o TS5B_Z_2Me_OTs_a	-4134.42	-4132.66	0.311306	-4134.07	0.124606	0.111863	-4134.19	-4134.18	-618.7
*******************************************************************************************************************************************************
Gconf correction requested to be applied to below relative values using quasi-harmonic Boltzmann factors
RXN: TS5A_1Me-formation (kcal/mol) DE_SPC	DE	DZPE	DH_SPC	T.DS	T.qh-DS	DG(T)_SPC	qh-DG(T)_SPC
*******************************************************************************************************************************************************
o 1Hindazole+Cs2CO3+MeOTs	0	0	0	0	0	0	0	0
o dep_indazole+Cs+CsHCO3+MeOTs	0.6	7.1	-1.5	-0.6	7.4	8	-8	-8.6
o indazole_Cs+MeOTs+CsHCO3	-17.7	-17.3	-0.9	-18.3	1.8	1	-20.1	-19.3
o TS5A_1Me+CsHCO3	-6.3	-9.9	-1	-6.4	-10.3	-14.6	3.9	8.1
o 1Me_indazole+CsOTs+CsHCO3	-45.9	-45.2	-0.3	-45.9	2.4	1	-48.3	-46.9
*******************************************************************************************************************************************************
RXN: TS5B_2Me-formation (kcal/mol) DE_SPC	DE	DZPE	DH_SPC	T.DS	T.qh-DS	DG(T)_SPC	qh-DG(T)_SPC
*******************************************************************************************************************************************************
o 1Hindazole+Cs2CO3+MeOTs	0	0	0	0	0	0	0	0
o dep_indazole+Cs+CsHCO3+MeOTs	0.6	7.1	-1.5	-0.6	7.4	8	-8	-8.6
o indazole_Cs+MeOTs+CsHCO3	-17.7	-17.3	-0.9	-18.3	1.8	1	-20.1	-19.3
o TS5B_2Me+CsHCO3	-4.1	-6.8	-1.1	-4.3	-10.1	-14.4	5.7	10
o 2Me_indazole+CsOTs+CsHCO3	-42.3	-41.8	0	-42.1	1.4	0.3	-43.5	-42.4
*******************************************************************************************************************************************************
RXN: calc4_Z_a (kcal/mol) DE_SPC	DE	DZPE	DH_SPC	T.DS	T.qh-DS	DG(T)_SPC	qh-DG(T)_SPC
*******************************************************************************************************************************************************
o dep_indazole_a+Cs	0	0	0	0	0	0	0	0
o indazole_Cs_a	-17.5	-23.1	0.5	-16.9	-5.7	-7.2	-11.2	-9.7
*******************************************************************************************************************************************************
RXN: calc4_E_b (kcal/mol) DE_SPC	DE	DZPE	DH_SPC	T.DS	T.qh-DS	DG(T)_SPC	qh-DG(T)_SPC
*******************************************************************************************************************************************************
o dep_indazole_b+Cs	0	0	0	0	0	0	0	0
o indazole_Cs_b	-18.9	-25.2	0.6	-18.3	-6.1	-7.4	-12.2	-10.9
*******************************************************************************************************************************************************
RXN: calc5_2Me_E (kcal/mol) DE_SPC	DE	DZPE	DH_SPC	T.DS	T.qh-DS	DG(T)_SPC	qh-DG(T)_SPC
*******************************************************************************************************************************************************
o indazole_Cs+MeOTs	0	0	0	0	0	0	0	0
o TS5B_E_2Me	13.4	10.3	-0.2	13.8	-12.4	-15.8	26.1	29.5
o 2Me_indazole_b+CsOTs	-24.7	-24.6	0.9	-24	-0.8	-1	-23.2	-23
*******************************************************************************************************************************************************
RXN: calc5_1Me_E (kcal/mol) DE_SPC	DE	DZPE	DH_SPC	T.DS	T.qh-DS	DG(T)_SPC	qh-DG(T)_SPC
*******************************************************************************************************************************************************
o indazole_Cs+MeOTs	0	0	0	0	0	0	0	0
o TS5A_E_1Me	11.3	7.3	-0.1	11.7	-12.4	-15.8	24	27.5
o 1Me_indazole_b+CsOTs	-28	-27.7	0.6	-27.4	0	-0.5	-27.4	-26.9
*******************************************************************************************************************************************************
RXN: calc5_2Me_Z (kcal/mol) DE_SPC	DE	DZPE	DH_SPC	T.DS	T.qh-DS	DG(T)_SPC	qh-DG(T)_SPC
*******************************************************************************************************************************************************
o indazole_Cs+MeOTs	0	0	0	0	0	0	0	0
o TS5B_Z_2Me	14.2	11.4	-0.1	14.6	-12.1	-15.8	26.7	30.4
o 2Me_indazole_a+CsOTs	-23.6	-23.6	0.9	-22.9	-0.9	-1.1	-22	-21.8
*******************************************************************************************************************************************************
RXN: calc5_1Me_Z (kcal/mol) DE_SPC	DE	DZPE	DH_SPC	T.DS	T.qh-DS	DG(T)_SPC	qh-DG(T)_SPC
*******************************************************************************************************************************************************
o indazole_Cs+MeOTs	0	0	0	0	0	0	0	0
o TS5A_Z_1Me	12.7	9	-0.1	13.1	-12.8	-16	25.9	29.1
o 1Me_indazole_a+CsOTs	-28.3	-27.9	0.6	-27.7	0.1	-0.4	-27.8	-27.3
*******************************************************************************************************************************************************
RXN: final_calc5_1Me_Boltz (kcal/mol) DE_SPC	DE	DZPE	DH_SPC	T.DS	T.qh-DS	DG(T)_SPC	qh-DG(T)_SPC
*******************************************************************************************************************************************************
o indazole_Cs+MeOTs	0	0	0	0	0	0	0	0
o TS5A_E_1Me	11.3	7.3	-0.1	11.7	-12.4	-15.8	24	27.5
o 1Me_indazole+CsOTs	-28.2	-27.8	0.6	-27.6	0.5	0	-28.1	-27.6
*******************************************************************************************************************************************************
RXN: calc6_deprot_1 (kcal/mol) DE_SPC	DE	DZPE	DH_SPC	T.DS	T.qh-DS	DG(T)_SPC	qh-DG(T)_SPC
*******************************************************************************************************************************************************
o 1Hindazole+Cs2CO3	0	0	0	0	0	0	0	0
o dep_indazole+Cs+Cs+HCO3	22.9	39	-2.2	21.2	13.2	14.3	8	6.9
*******************************************************************************************************************************************************
RXN: calc6_deprot_2 (kcal/mol) DE_SPC	DE	DZPE	DH_SPC	T.DS	T.qh-DS	DG(T)_SPC	qh-DG(T)_SPC
*******************************************************************************************************************************************************
o 1Hindazole+Cs2CO3	0	0	0	0	0	0	0	0
o dep_indazole+Cs+CsHCO3	0.6	7.1	-1.5	-0.6	7.4	8	-8	-8.6
*******************************************************************************************************************************************************

## Sheet: Goodvibes_output_3CO2Me_Br_50Te
GoodVibes v3.2 2024/01/27 08:06:10
Citation: Luchini	G.; Alegre-Requena	J. V.; Funes-Ardoiz	I.; Paton	R. S. F1000Research	2020	9	291
GoodVibes version 3.2 DOI: 10.12688/f1000research.22758.1
o Requested: --imag -c 1 --spc sp -t 323.15 --pes BioCryst_pathways.yaml --csv
Temperature = 323.15 Kelvin Concentration = 1.0 mol/L
All energetic values below shown in Hartree unless otherwise specified.
x Caution! Different levels of theory found:
-PBE1PBE/GenECP: indazole_1Me_Cs_1_pos_a.log	indazole_1Me_Cs_2_pos_b.log	indazole_2Me_Cs_O_pos_b.log	indazole_Cs_1_neut_a.log	indazole_Cs_1_neut_b.log	indazole_Cs_2_neut_a.log	indazole_Cs_2_neut_b.log	indazole_Cs_O_neut_a.log	product_CO3HCs.log	product_CsOTs.log	rxt_CO3Cs2.log	TS5A_E_1Me_OTs_b.log	TS5A_Z_1Me_OTs_b.log	TS5B_E_2Me_OTs_a.log	TS5B_Z_2Me_OTs_a.log
-PBE1PBE/def2SVP: indazole_deprot_neg_a.log	indazole_deprot_neg_b.log	INT_1PPh3OMe_b_neut.log	INT_deprot-indazole_MeOPPh3_neut_a.log	product_BaseH_neut.log	product_HCO3.log	product_indazole_1Me_neut_a.log	product_indazole_1Me_neut_b.log	product_indazole_2Me_neut_a.log	product_indazole_2Me_neut_b.log	product_OPPh3_neut.log	product_OTs.log	rxt_Base_neg_b.log	rxt_indazole_1H_neut.log	rxt_indazole_2H_neut.log	rxt_MeOPPh3_pos.log	rxt_MeOTs.log	TS1a_E_SN2_neut_c.log	TS1a_Z_SN2_neut_a.log	TS1a_Z_SN2_neut_d.log	TS2a_E_SN2_neut_b.log	TS2a_Z_SN2_neut_a.log	TS2a_Z_SN2_neut_c.log	ts_opt_TS1b_2p2_2Me-indazole_a.log	ts_opt_TS1b_2p2_2Me-indazole_b.log	ts_opt_TS1c_4p2_2Me-indazole.log	ts_opt_TS2b_2p2_1Me-indazole.log
-PBE1PBE/def2TZVP: rxt_Cs_pos.log
Using vibrational scale factor 1.0: differing levels of theory detected.
Caution! Implicit solvation (SMD/CPCM) detected. Enthalpic and entropic terms cannot be safely separated. Use them at your own risk!
Entropic quasi-harmonic treatment: frequency cut-off value of 100.0 wavenumbers will be applied.
QS = Grimme: Using a mixture of RRHO and Free-rotor vibrational entropies.
REF: Grimme	S. Chem. Eur. J. 2012	18	9955-9964
Combining final single point energy with thermal corrections.
Structure	E_SPC	E	ZPE	H_SPC	T.S	T.qh-S	G(T)_SPC	qh-G(T)_SPC	im	freq
*******************************************************************************************************************************************************
o indazole_1Me_Cs_1_pos_a	-3239.94	-3238.93	0.181433	-3239.74	0.069908	0.066024	-3239.81	-3239.81
o indazole_1Me_Cs_2_pos_b	-3239.96	-3238.95	0.181368	-3239.76	0.069664	0.065936	-3239.82	-3239.82
o indazole_2Me_Cs_O_pos_b	-3239.94	-3238.94	0.181247	-3239.74	0.070636	0.066189	-3239.81	-3239.81
o indazole_Cs_1_neut_a	-3200.2	-3199.23	0.139726	-3200.05	0.065421	0.061955	-3200.11	-3200.11
o indazole_Cs_1_neut_b	-3200.2	-3199.23	0.139753	-3200.05	0.065344	0.061865	-3200.11	-3200.11
o indazole_Cs_2_neut_a	-3200.2	-3199.23	0.1396	-3200.05	0.066061	0.062196	-3200.11	-3200.11
o indazole_Cs_2_neut_b	-3200.21	-3199.24	0.139772	-3200.05	0.06495	0.061695	-3200.11	-3200.11
o indazole_Cs_O_neut_a	-3200.2	-3199.22	0.139582	-3200.04	0.064806	0.061573	-3200.1	-3200.1
o indazole_deprot_neg_a	-3180.08	-3179.1	0.138882	-3179.93	0.05587	0.0544	-3179.98	-3179.98
o indazole_deprot_neg_b	-3180.08	-3179.1	0.138831	-3179.92	0.056029	0.054482	-3179.98	-3179.98
o INT_1PPh3OMe_b_neut	-4330.67	-4328.72	0.46177	-4330.17	0.11027	0.1011	-4330.28	-4330.27
o INT_deprot-indazole_MeOPPh3_neut_a	-4330.67	-4328.71	0.460847	-4330.17	0.11623	0.104356	-4330.29	-4330.28
o product_BaseH_neut	-567.284	-566.64	0.140761	-567.129	0.052572	0.050897	-567.182	-567.18
o product_CO3HCs	-284.507	-284.194	0.028074	-284.472	0.03929	0.038622	-284.511	-284.51
o product_CsOTs	-914.639	-913.888	0.132022	-914.492	0.061193	0.056837	-914.553	-914.549
o product_HCO3	-264.374	-264.045	0.026942	-264.342	0.029847	0.029848	-264.372	-264.372
o product_indazole_1Me_neut_a	-3219.85	-3218.83	0.180389	-3219.65	0.060916	0.058909	-3219.71	-3219.71
o product_indazole_1Me_neut_b	-3219.85	-3218.83	0.18038	-3219.65	0.060705	0.058801	-3219.71	-3219.71
o product_indazole_2Me_neut_a	-3219.84	-3218.83	0.180894	-3219.64	0.059482	0.05795	-3219.7	-3219.7
o product_indazole_2Me_neut_b	-3219.84	-3218.83	0.180803	-3219.64	0.059644	0.058085	-3219.7	-3219.7
o product_OPPh3_neut	-1110.88	-1109.93	0.280404	-1110.58	0.069732	0.065215	-1110.65	-1110.65
o product_OTs	-894.514	-893.745	0.131662	-894.37	0.050398	0.048522	-894.421	-894.419
o rxt_Base_neg_b	-566.777	-566.122	0.126716	-566.637	0.051735	0.050235	-566.688	-566.687
o rxt_CO3Cs2	-304.116	-303.806	0.016225	-304.09	0.04711	0.045547	-304.137	-304.136
o rxt_Cs_pos	-20.0974	-20.0974	0	-20.0948	0.017742	0.017742	-20.1126	-20.1126
o rxt_indazole_1H_neut	-3180.57	-3179.6	0.153056	-3180.4	0.055911	0.05455	-3180.46	-3180.46
o rxt_indazole_2H_neut	-3180.56	-3179.59	0.153099	-3180.4	0.056008	0.054599	-3180.45	-3180.45
o rxt_MeOPPh3_pos	-1150.58	-1149.6	0.321178	-1150.23	0.073461	0.069304	-1150.31	-1150.3
o rxt_MeOTs	-934.236	-933.442	0.171708	-934.049	0.055617	0.053369	-934.105	-934.102
o TS1a_E_SN2_neut_c	-4330.66	-4328.7	0.46013	-4330.16	0.113069	0.102112	-4330.27	-4330.26	-598.63
o TS1a_Z_SN2_neut_a	-4330.65	-4328.7	0.460105	-4330.16	0.114335	0.102684	-4330.27	-4330.26	-603.3
o TS1a_Z_SN2_neut_d	-4330.65	-4328.7	0.46005	-4330.16	0.112946	0.102056	-4330.27	-4330.26	-600.29
o TS2a_E_SN2_neut_b	-4330.65	-4328.7	0.460065	-4330.15	0.112124	0.101758	-4330.27	-4330.26	-614
o TS2a_Z_SN2_neut_a	-4330.65	-4328.7	0.460006	-4330.15	0.114555	0.102763	-4330.27	-4330.26	-616.83
o TS2a_Z_SN2_neut_c	-4330.65	-4328.69	0.459768	-4330.16	0.113729	0.102597	-4330.27	-4330.26	-601.31
o TS5A_E_1Me_OTs_b	-4134.42	-4132.67	0.311292	-4134.08	0.104123	0.093921	-4134.18	-4134.17	-626.63
o TS5A_Z_1Me_OTs_b	-4134.42	-4132.66	0.31127	-4134.08	0.103483	0.093577	-4134.18	-4134.17	-625.71
o TS5B_E_2Me_OTs_a	-4134.42	-4132.66	0.311135	-4134.08	0.104104	0.09392	-4134.18	-4134.17	-605.52
o TS5B_Z_2Me_OTs_a	-4134.42	-4132.66	0.311306	-4134.07	0.104422	0.093877	-4134.18	-4134.17	-618.7
o ts_opt_TS1b_2p2_2Me-indazole_a	-4330.6	-4328.65	0.459019	-4330.11	0.109499	0.100353	-4330.22	-4330.21	-582.77
o ts_opt_TS1b_2p2_2Me-indazole_b	-4330.6	-4328.65	0.458376	-4330.1	0.110961	0.101356	-4330.21	-4330.2	-558.26
o ts_opt_TS1c_4p2_2Me-indazole	-4330.59	-4328.64	0.45794	-4330.1	0.11577	0.10357	-4330.21	-4330.2	-563.96
o ts_opt_TS2b_2p2_1Me-indazole	-4330.6	-4328.64	0.458526	-4330.1	0.109046	0.100448	-4330.21	-4330.2	-572.95
*******************************************************************************************************************************************************
Gconf correction requested to be applied to below relative values using quasi-harmonic Boltzmann factors
Warning! ts_opt-freq_TS1c_4p2_2Me* is specified in BioCryst_pathways.yaml but no thermochemistry data found
RXN: TS5A_1Me-formation (kcal/mol) DE_SPC	DE	DZPE	DH_SPC	T.DS	T.qh-DS	DG(T)_SPC	qh-DG(T)_SPC
*******************************************************************************************************************************************************
o 1Hindazole+Cs2CO3+MeOTs	0	0	0	0	0	0	0	0
o dep_indazole+Cs+CsHCO3+MeOTs	0.6	7.1	-1.5	-0.6	6.7	7.2	-7.2	-7.7
o indazole_Cs+MeOTs+CsHCO3	-17.8	-17.4	-0.9	-18.4	1.5	0.9	-19.9	-19.2
o TS5A_1Me+CsHCO3	-6.4	-9.9	-1	-6.6	-9.4	-13	2.8	6.4
o 1Me_indazole+CsOTs+CsHCO3	-45.9	-45.2	-0.3	-45.9	2.1	1	-48	-46.9
*******************************************************************************************************************************************************
RXN: TS5B_2Me-formation (kcal/mol) DE_SPC	DE	DZPE	DH_SPC	T.DS	T.qh-DS	DG(T)_SPC	qh-DG(T)_SPC
*******************************************************************************************************************************************************
o 1Hindazole+Cs2CO3+MeOTs	0	0	0	0	0	0	0	0
o dep_indazole+Cs+CsHCO3+MeOTs	0.6	7.1	-1.5	-0.6	6.7	7.2	-7.2	-7.7
o indazole_Cs+MeOTs+CsHCO3	-17.8	-17.4	-0.9	-18.4	1.5	0.9	-19.9	-19.2
o TS5B_2Me+CsHCO3	-4.2	-6.8	-1.1	-4.5	-9.2	-12.8	4.7	8.3
o 2Me_indazole+CsOTs+CsHCO3	-42.3	-41.8	0	-42.2	1.2	0.3	-43.3	-42.4
*******************************************************************************************************************************************************

## Sheet: Goodvibes_output_7CO2Me_90Temp_
GoodVibes v3.2 2024/01/27 14:10:44
Citation: Luchini	G.; Alegre-Requena	J. V.; Funes-Ardoiz	I.; Paton	R. S. F1000Research	2020	9	291
GoodVibes version 3.2 DOI: 10.12688/f1000research.22758.1
o Requested: --imag -c 1 --spc sp -t 363.15 --pes BioCryst_pathways_7CO2Me_cesium.yaml --csv
Temperature = 363.15 Kelvin Concentration = 1.0 mol/L
All energetic values below shown in Hartree unless otherwise specified.
x Caution! Different levels of theory found:
-PBE1PBE/def2SVP: ../dep_indazole_E_7CO2Me_a.log	../dep_indazole_Z_7CO2Me_a.log	../product_indazole_1Me_E_7CO2Me.log	../product_indazole_1Me_Z_7CO2Me.log	../product_indazole_2Me_E_7CO2Me.log	../product_indazole_2Me_Z_7CO2Me.log	../rxt_indazole_1H_E_7CO2Me_a.log	../rxt_indazole_1H_Z_7CO2Me_a.log	../rxt_indazole_2H_E_7CO2Me_a.log	../rxt_indazole_2H_Z_7CO2Me_a.log	product_HCO3.log	product_OTs.log	rxt_MeOTs.log
-PBE1PBE/GenECP: indazole_Cs_1_E_7CO2Me.log	indazole_Cs_1_Z_7CO2Me.log	indazole_Cs_2_E_7CO2Me.log	indazole_Cs_2_Z_7CO2Me.log	product_CO3HCs.log	product_CsOTs.log	rxt_CO3Cs2.log	TS5A_Z_7CO2Me_OTs_a.log	TS5A_Z_7CO2Me_OTs_b.log	TS5B_E_7CO2Me_OTs_a.log	TS5B_Z_7CO2Me_OTs_a.log	TS5B_Z_7CO2Me_OTs_b.log
-PBE1PBE/def2TZVP: rxt_Cs_pos.log
Using vibrational scale factor 1.0: differing levels of theory detected.
Caution! Implicit solvation (SMD/CPCM) detected. Enthalpic and entropic terms cannot be safely separated. Use them at your own risk!
Entropic quasi-harmonic treatment: frequency cut-off value of 100.0 wavenumbers will be applied.
QS = Grimme: Using a mixture of RRHO and Free-rotor vibrational entropies.
REF: Grimme	S. Chem. Eur. J. 2012	18	9955-9964
Combining final single point energy with thermal corrections.
Structure	E_SPC	E	ZPE	H_SPC	T.S	T.qh-S	G(T)_SPC	qh-G(T)_SPC	im	freq
*******************************************************************************************************************************************************
o dep_indazole_E_7CO2Me_a	-606.799	-606.132	0.149075	-606.635	0.059182	0.058089	-606.694	-606.693
o dep_indazole_Z_7CO2Me_a	-606.798	-606.131	0.149006	-606.633	0.059244	0.058166	-606.692	-606.691
o product_indazole_1Me_E_7CO2Me	-646.574	-645.874	0.191072	-646.365	0.064558	0.062961	-646.429	-646.428
o product_indazole_1Me_Z_7CO2Me	-646.574	-645.875	0.190845	-646.365	0.06534	0.06354	-646.431	-646.429
o product_indazole_2Me_E_7CO2Me	-646.573	-645.873	0.190777	-646.364	0.065569	0.063783	-646.429	-646.428
o product_indazole_2Me_Z_7CO2Me	-646.572	-645.872	0.190649	-646.363	0.065763	0.063832	-646.429	-646.427
o rxt_indazole_1H_E_7CO2Me_a	-607.305	-606.646	0.163307	-607.126	0.05964	0.058589	-607.186	-607.185
o rxt_indazole_1H_Z_7CO2Me_a	-607.307	-606.647	0.163378	-607.127	0.059493	0.058531	-607.187	-607.186
o rxt_indazole_2H_E_7CO2Me_a	-607.295	-606.634	0.16332	-607.115	0.059965	0.058617	-607.175	-607.174
o rxt_indazole_2H_Z_7CO2Me_a	-607.294	-606.633	0.163467	-607.114	0.059506	0.058432	-607.174	-607.173
o indazole_Cs_1_E_7CO2Me	-626.928	-626.27	0.149924	-626.759	0.070907	0.067258	-626.83	-626.827
o indazole_Cs_1_Z_7CO2Me	-626.931	-626.275	0.149922	-626.762	0.070272	0.067091	-626.833	-626.829
o indazole_Cs_2_E_7CO2Me	-626.928	-626.27	0.149928	-626.759	0.070871	0.067241	-626.83	-626.827
o indazole_Cs_2_Z_7CO2Me	-626.931	-626.275	0.149921	-626.762	0.070273	0.067092	-626.833	-626.829
o product_CO3HCs	-284.507	-284.194	0.028074	-284.471	0.045312	0.044472	-284.516	-284.515
o product_CsOTs	-914.639	-913.888	0.132022	-914.489	0.071956	0.066707	-914.561	-914.556
o product_HCO3	-264.374	-264.045	0.026942	-264.341	0.034327	0.034328	-264.376	-264.376
o product_OTs	-894.514	-893.745	0.131662	-894.367	0.059422	0.057135	-894.427	-894.425
o rxt_CO3Cs2	-304.116	-303.806	0.016225	-304.089	0.05436	0.052431	-304.143	-304.141
o rxt_Cs_pos	-20.0974	-20.0974	0	-20.0945	0.020139	0.020139	-20.1147	-20.1147
o rxt_MeOTs	-934.236	-933.442	0.171708	-934.046	0.065818	0.063053	-934.111	-934.109
o TS5A_Z_7CO2Me_OTs_a	-1561.14	-1559.7	0.321473	-1560.78	0.117054	0.106161	-1560.9	-1560.89	-598.67
o TS5A_Z_7CO2Me_OTs_b	-1561.14	-1559.7	0.321343	-1560.78	0.12014	0.107563	-1560.9	-1560.89	-608.54
o TS5B_E_7CO2Me_OTs_a	-1561.15	-1559.7	0.321726	-1560.79	0.116434	0.105498	-1560.9	-1560.89	-620.53
o TS5B_Z_7CO2Me_OTs_a	-1561.13	-1559.68	0.320799	-1560.77	0.122533	0.109004	-1560.9	-1560.88	-601.08
o TS5B_Z_7CO2Me_OTs_b	-1561.15	-1559.71	0.321549	-1560.79	0.117884	0.106328	-1560.91	-1560.9	-622.06
*******************************************************************************************************************************************************
Gconf correction requested to be applied to below relative values using quasi-harmonic Boltzmann factors
RXN: TS5A_1Me-formation (kcal/mol) DE_SPC	DE	DZPE	DH_SPC	T.DS	T.qh-DS	DG(T)_SPC	qh-DG(T)_SPC
*******************************************************************************************************************************************************
o 1Hindazole+Cs2CO3+MeOTs	0	0	0	0	0	0	0	0
o dep_indazole+Cs+CsHCO3+MeOTs	11.6	18.5	-1.5	10.3	6.7	7.3	3.6	3
o indazole_Cs+MeOTs+CsHCO3	-9.8	-10	-1	-10.5	1.4	0.7	-11.8	-11.1
o TS5A_1Me+CsHCO3	4.4	1.8	-1.2	4.1	-9.3	-14.1	13.5	18.2
o 1Me_indazole+CsOTs+CsHCO3	-39.7	-39	-0.2	-39.6	1.7	0.3	-41.3	-39.9
*******************************************************************************************************************************************************
RXN: TS5B_2Me-formation (kcal/mol) DE_SPC	DE	DZPE	DH_SPC	T.DS	T.qh-DS	DG(T)_SPC	qh-DG(T)_SPC
*******************************************************************************************************************************************************
o 1Hindazole+Cs2CO3+MeOTs	0	0	0	0	0	0	0	0
o dep_indazole+Cs+CsHCO3+MeOTs	11.6	18.5	-1.5	10.3	6.7	7.3	3.6	3
o indazole_Cs+MeOTs+CsHCO3	-9.8	-10	-1	-10.5	1.4	0.7	-11.8	-11.1
o TS5B_2Me+CsHCO3	0.8	-2.9	-1	0.6	-10.7	-15	11.4	15.6
o 2Me_indazole+CsOTs+CsHCO3	-38.7	-37.3	-0.3	-38.6	2.1	0.6	-40.7	-39.3
*******************************************************************************************************************************************************

## Sheet: Goodvibes_output_7CO2Me_50Temp_
GoodVibes v3.2 2024/01/27 13:54:29
Citation: Luchini	G.; Alegre-Requena	J. V.; Funes-Ardoiz	I.; Paton	R. S. F1000Research	2020	9	291
GoodVibes version 3.2 DOI: 10.12688/f1000research.22758.1
o Requested: --imag -c 1 --spc sp -t 323.15 --pes BioCryst_pathways_7CO2Me_mitsunobu.yaml --csv
Temperature = 323.15 Kelvin Concentration = 1.0 mol/L
All energetic values below shown in Hartree unless otherwise specified.
Using vibrational scale factor 1.0 for PBE1PBE/def2SVP level of theory
Caution! Implicit solvation (SMD/CPCM) detected. Enthalpic and entropic terms cannot be safely separated. Use them at your own risk!
Entropic quasi-harmonic treatment: frequency cut-off value of 100.0 wavenumbers will be applied.
QS = Grimme: Using a mixture of RRHO and Free-rotor vibrational entropies.
REF: Grimme	S. Chem. Eur. J. 2012	18	9955-9964
Combining final single point energy with thermal corrections.
Structure	E_SPC	E	ZPE	H_SPC	T.S	T.qh-S	G(T)_SPC	qh-G(T)_SPC	im	freq
*******************************************************************************************************************************************************
o dep_indazole_E_7CO2Me_a	-606.799	-606.132	0.149075	-606.638	0.050032	0.049174	-606.688	-606.687
o dep_indazole_Z_7CO2Me_a	-606.798	-606.131	0.149006	-606.636	0.050083	0.049237	-606.686	-606.685
o product_indazole_1Me_E_7CO2Me	-646.574	-645.874	0.191072	-646.368	0.05439	0.053126	-646.423	-646.421
o product_indazole_1Me_Z_7CO2Me	-646.574	-645.875	0.190845	-646.369	0.05508	0.053657	-646.424	-646.422
o product_indazole_2Me_E_7CO2Me	-646.573	-645.873	0.190777	-646.367	0.055282	0.05386	-646.423	-646.421
o product_indazole_2Me_Z_7CO2Me	-646.572	-645.872	0.190649	-646.367	0.05545	0.053915	-646.422	-646.42
o rxt_indazole_1H_E_7CO2Me_a	-607.305	-606.646	0.163307	-607.129	0.050372	0.049551	-607.18	-607.179
o rxt_indazole_1H_Z_7CO2Me_a	-607.307	-606.647	0.163378	-607.13	0.050245	0.049499	-607.181	-607.18
o rxt_indazole_2H_E_7CO2Me_a	-607.295	-606.634	0.16332	-607.118	0.05067	0.049591	-607.169	-607.168
o rxt_indazole_2H_Z_7CO2Me_a	-607.294	-606.633	0.163467	-607.117	0.050263	0.04942	-607.168	-607.167
o product_BaseH_neut	-567.284	-566.64	0.140761	-567.129	0.052572	0.050897	-567.182	-567.18
o product_OPPh3_neut	-1110.88	-1109.93	0.280404	-1110.58	0.069732	0.065215	-1110.65	-1110.65
o rxt_Base_neg_b	-566.777	-566.122	0.126716	-566.637	0.051735	0.050235	-566.688	-566.687
o rxt_MeOPPh3_pos	-1150.58	-1149.6	0.321178	-1150.23	0.073461	0.069304	-1150.31	-1150.3
o TS1a_E_7CO2Me_opt_c	-1757.38	-1755.73	0.469919	-1756.87	0.108834	0.098289	-1756.98	-1756.97	-596.66
o TS1a_E_7CO2Me_opt_d	-1757.38	-1755.73	0.47044	-1756.87	0.105964	0.096573	-1756.98	-1756.97	-611.77
o TS1a_Z_7CO2Me_opt_a	-1757.38	-1755.73	0.470419	-1756.87	0.106596	0.09707	-1756.98	-1756.97	-609.87
o TS1a_Z_7CO2Me_opt_b	-1757.37	-1755.73	0.469863	-1756.87	0.110434	0.098986	-1756.98	-1756.97	-594.49
o TS2a_E_7CO2Me_opt_b	-1757.38	-1755.74	0.470327	-1756.88	0.104778	0.096142	-1756.98	-1756.97	-611.27
o TS2a_Z_7CO2Me_opt_c	-1757.38	-1755.74	0.470398	-1756.87	0.105697	0.096627	-1756.98	-1756.97	-593.02
o TS2a_Z_7CO2Me_opt_d	-1757.38	-1755.73	0.470228	-1756.87	0.107731	0.097621	-1756.98	-1756.97	-597.11
*******************************************************************************************************************************************************
Gconf correction requested to be applied to below relative values using quasi-harmonic Boltzmann factors
RXN: calc2_isomerization (kcal/mol) DE_SPC	DE	DZPE	DH_SPC	T.DS	T.qh-DS	DG(T)_SPC	qh-DG(T)_SPC
*******************************************************************************************************************************************************
o 2Hindazole	0	0	0	0	0	0	0	0
o 1Hindazole	-7.6	-8.1	0	-7.6	-0.2	0	-7.4	-7.6
*******************************************************************************************************************************************************
RXN: TS2_1Me-formation (kcal/mol) DE_SPC	DE	DZPE	DH_SPC	T.DS	T.qh-DS	DG(T)_SPC	qh-DG(T)_SPC
*******************************************************************************************************************************************************
o 1Hindazole+Base+MeOPPh3	0	0	0	0	0	0	0	0
o dep_indazole+BaseH+MeOPPh3	0	-1.8	-0.2	0	0.3	0.2	-0.4	-0.2
o TS2a_1Me+BaseH	-2.2	-7.3	-0.1	-1.8	-10.8	-13.4	9	11.6
o 1Me_indazole+OPPh3+BaseH	-49.4	-52	0.5	-48.7	1.1	0.4	-49.8	-49.1
*******************************************************************************************************************************************************
RXN: TS1_2Me-formation (kcal/mol) DE_SPC	DE	DZPE	DH_SPC	T.DS	T.qh-DS	DG(T)_SPC	qh-DG(T)_SPC
*******************************************************************************************************************************************************
o 1Hindazole+Base+MeOPPh3	0	0	0	0	0	0	0	0
o dep_indazole+BaseH+MeOPPh3	0	-1.8	-0.2	0	0.3	0.2	-0.4	-0.2
o TS1a_2Me+BaseH	0.6	-4	-0.2	1	-9.3	-12.6	10.3	13.6
o 2Me_indazole+OPPh3+BaseH	-48.4	-50.3	0.4	-47.8	1.4	0.6	-49.2	-48.4
*******************************************************************************************************************************************************

## Sheet: Goodvibes_output_3CN_90Temp_Ces
GoodVibes v3.2 2024/01/27 14:49:30
Citation: Luchini	G.; Alegre-Requena	J. V.; Funes-Ardoiz	I.; Paton	R. S. F1000Research	2020	9	291
GoodVibes version 3.2 DOI: 10.12688/f1000research.22758.1
o Requested: --imag -c 1 --spc sp -t 363.15 --pes BioCryst_pathways_3CN_cesium.yaml --csv
Temperature = 363.15 Kelvin Concentration = 1.0 mol/L
All energetic values below shown in Hartree unless otherwise specified.
x Caution! Different levels of theory found:
-PBE1PBE/def2SVP: ../dep_indazole_3CN_a.log	../product_indazole_1Me_3CN.log	../product_indazole_2Me_3CN.log	../rxt_indazole_1H_3CN.log	../rxt_indazole_2H_3CN.log	product_HCO3.log	product_OTs.log	rxt_MeOTs.log
-PBE1PBE/GenECP: indazole_Cs_1_3CN.log	indazole_Cs_2_3CN.log	product_CO3HCs.log	product_CsOTs.log	rxt_CO3Cs2.log	TS5A_3CN_OTs_a.log	TS5A_3CN_OTs_b.log	TS5B_3CN_OTs_a.log	TS5B_3CN_OTs_b.log
-PBE1PBE/def2TZVP: rxt_Cs_pos.log
Using vibrational scale factor 1.0: differing levels of theory detected.
Caution! Implicit solvation (SMD/CPCM) detected. Enthalpic and entropic terms cannot be safely separated. Use them at your own risk!
Entropic quasi-harmonic treatment: frequency cut-off value of 100.0 wavenumbers will be applied.
QS = Grimme: Using a mixture of RRHO and Free-rotor vibrational entropies.
REF: Grimme	S. Chem. Eur. J. 2012	18	9955-9964
Combining final single point energy with thermal corrections.
Structure	E_SPC	E	ZPE	H_SPC	T.S	T.qh-S	G(T)_SPC	qh-G(T)_SPC	im	freq
*******************************************************************************************************************************************************
o dep_indazole_3CN_a	-471.258	-470.745	0.104951	-471.141	0.050174	0.04991	-471.191	-471.191
o product_indazole_1Me_3CN	-511.022	-510.476	0.146421	-510.861	0.056246	0.055563	-510.917	-510.917
o product_indazole_2Me_3CN	-511.015	-510.469	0.146156	-510.854	0.057098	0.055813	-510.911	-510.91
o rxt_indazole_1H_3CN	-471.744	-471.238	0.118952	-471.613	0.050503	0.050285	-471.663	-471.663
o rxt_indazole_2H_3CN	-471.736	-471.229	0.118966	-471.605	0.050499	0.050263	-471.655	-471.655
o indazole_Cs_1_3CN	-491.382	-490.878	0.105662	-491.262	0.062129	0.059555	-491.324	-491.321
o indazole_Cs_2_3CN	-491.382	-490.878	0.105663	-491.262	0.062119	0.05955	-491.324	-491.321
o product_CO3HCs	-284.507	-284.194	0.028074	-284.471	0.045312	0.044472	-284.516	-284.515
o product_CsOTs	-914.639	-913.888	0.132022	-914.489	0.071956	0.066707	-914.561	-914.556
o product_HCO3	-264.374	-264.045	0.026942	-264.341	0.034327	0.034328	-264.376	-264.376
o product_OTs	-894.514	-893.745	0.131662	-894.367	0.059422	0.057135	-894.427	-894.425
o rxt_CO3Cs2	-304.116	-303.806	0.016225	-304.089	0.05436	0.052431	-304.143	-304.141
o rxt_Cs_pos	-20.0974	-20.0974	0	-20.0945	0.020139	0.020139	-20.1147	-20.1147
o rxt_MeOTs	-934.236	-933.442	0.171708	-934.046	0.065818	0.063053	-934.111	-934.109
o TS5A_3CN_OTs_a	-1425.6	-1424.3	0.277003	-1425.29	0.111676	0.100062	-1425.4	-1425.39	-628.49
o TS5A_3CN_OTs_b	-1425.59	-1424.29	0.277071	-1425.28	0.110721	0.099721	-1425.39	-1425.38	-611.78
o TS5B_3CN_OTs_a	-1425.59	-1424.3	0.277163	-1425.28	0.109978	0.099101	-1425.39	-1425.38	-627.14
o TS5B_3CN_OTs_b	-1425.6	-1424.3	0.277081	-1425.28	0.109971	0.099432	-1425.39	-1425.38	-612.06
*******************************************************************************************************************************************************
Gconf correction requested to be applied to below relative values using quasi-harmonic Boltzmann factors
RXN: TS5A_1Me-formation (kcal/mol) DE_SPC	DE	DZPE	DH_SPC	T.DS	T.qh-DS	DG(T)_SPC	qh-DG(T)_SPC
*******************************************************************************************************************************************************
o 1Hindazole+Cs2CO3+MeOTs	0	0	0	0	0	0	0	0
o dep_indazole+Cs+CsHCO3+MeOTs	-2	4.5	-1.4	-3	6.8	7.4	-9.8	-10.4
o indazole_Cs+MeOTs+CsHCO3	-18.8	-17.6	-0.9	-19.3	2.1	1.3	-21.4	-20.6
o TS5A_1Me+CsHCO3	-5.4	-7.6	-1.1	-5.5	-8.6	-13.3	3.1	7.8
o 1Me_indazole+CsOTs+CsHCO3	-46.2	-45.3	-0.2	-46.1	1.8	0.6	-47.9	-46.7
*******************************************************************************************************************************************************
RXN: TS5B_2Me-formation (kcal/mol) DE_SPC	DE	DZPE	DH_SPC	T.DS	T.qh-DS	DG(T)_SPC	qh-DG(T)_SPC
*******************************************************************************************************************************************************
o 1Hindazole+Cs2CO3+MeOTs	0	0	0	0	0	0	0	0
o dep_indazole+Cs+CsHCO3+MeOTs	-2	4.5	-1.4	-3	6.8	7.4	-9.8	-10.4
o indazole_Cs+MeOTs+CsHCO3	-18.8	-17.6	-0.9	-19.3	2.1	1.3	-21.4	-20.6
o TS5B_2Me+CsHCO3	-4.6	-6.4	-1.1	-4.8	-9.3	-13.4	4.5	8.6
o 2Me_indazole+CsOTs+CsHCO3	-41.7	-40.5	-0.4	-41.7	2.3	0.8	-44	-42.5
*******************************************************************************************************************************************************

## Sheet: Goodvibes_output_3CN_50Temp_Mit
GoodVibes v3.2 2024/01/27 14:46:51
Citation: Luchini	G.; Alegre-Requena	J. V.; Funes-Ardoiz	I.; Paton	R. S. F1000Research	2020	9	291
GoodVibes version 3.2 DOI: 10.12688/f1000research.22758.1
o Requested: --imag -c 1 --spc sp -t 323.15 --pes BioCryst_pathways_3CN_mitsunobu.yaml --csv
Temperature = 323.15 Kelvin Concentration = 1.0 mol/L
All energetic values below shown in Hartree unless otherwise specified.
Using vibrational scale factor 1.0 for PBE1PBE/def2SVP level of theory
Caution! Implicit solvation (SMD/CPCM) detected. Enthalpic and entropic terms cannot be safely separated. Use them at your own risk!
Entropic quasi-harmonic treatment: frequency cut-off value of 100.0 wavenumbers will be applied.
QS = Grimme: Using a mixture of RRHO and Free-rotor vibrational entropies.
REF: Grimme	S. Chem. Eur. J. 2012	18	9955-9964
Combining final single point energy with thermal corrections.
Structure	E_SPC	E	ZPE	H_SPC	T.S	T.qh-S	G(T)_SPC	qh-G(T)_SPC	im	freq
*******************************************************************************************************************************************************
o dep_indazole_3CN_a	-471.258	-470.745	0.104951	-471.144	0.042642	0.042451	-471.186	-471.186
o product_indazole_1Me_3CN	-511.022	-510.476	0.146421	-510.864	0.047606	0.047089	-510.912	-510.911
o product_indazole_2Me_3CN	-511.015	-510.469	0.146156	-510.857	0.048357	0.047328	-510.905	-510.904
o rxt_indazole_1H_3CN	-471.744	-471.238	0.118952	-471.615	0.042866	0.042711	-471.658	-471.658
o rxt_indazole_2H_3CN	-471.736	-471.229	0.118966	-471.607	0.042868	0.042699	-471.65	-471.65
o product_BaseH_neut	-567.284	-566.64	0.140761	-567.129	0.052572	0.050897	-567.182	-567.18
o product_OPPh3_neut	-1110.88	-1109.93	0.280404	-1110.58	0.069732	0.065215	-1110.65	-1110.65
o rxt_Base_neg_b	-566.777	-566.122	0.126716	-566.637	0.051735	0.050235	-566.688	-566.687
o rxt_MeOPPh3_pos	-1150.58	-1149.6	0.321178	-1150.23	0.073461	0.069304	-1150.31	-1150.3
o TS1a_3CN_opt_a	-1621.83	-1620.34	0.425807	-1621.37	0.102002	0.092027	-1621.47	-1621.46	-613.13
o TS1a_3CN_opt_c	-1621.83	-1620.34	0.425839	-1621.37	0.100025	0.091182	-1621.47	-1621.46	-610.28
o TS2a_3CN_opt_a	-1621.83	-1620.34	0.426096	-1621.37	0.101288	0.091705	-1621.47	-1621.46	-612.96
o TS2a_3CN_opt_c	-1621.83	-1620.34	0.42576	-1621.37	0.101209	0.091768	-1621.47	-1621.46	-606.28
*******************************************************************************************************************************************************
Gconf correction requested to be applied to below relative values using quasi-harmonic Boltzmann factors
RXN: calc2_isomerization (kcal/mol) DE_SPC	DE	DZPE	DH_SPC	T.DS	T.qh-DS	DG(T)_SPC	qh-DG(T)_SPC
*******************************************************************************************************************************************************
o 2Hindazole	0	0	0	0	0	0	0	0
o 1Hindazole	-5.1	-5.3	0	-5.1	0	0	-5.1	-5.1
*******************************************************************************************************************************************************
RXN: TS2_1Me-formation (kcal/mol) DE_SPC	DE	DZPE	DH_SPC	T.DS	T.qh-DS	DG(T)_SPC	qh-DG(T)_SPC
*******************************************************************************************************************************************************
o 1Hindazole+Base+MeOPPh3	0	0	0	0	0	0	0	0
o dep_indazole+BaseH+MeOPPh3	-13.5	-15.8	0	-13.3	0.4	0.3	-13.7	-13.6
o TS2a_1Me+BaseH	-10.2	-14.1	-0.1	-9.8	-8.5	-11.9	-1.2	2.1
o 1Me_indazole+OPPh3+BaseH	-55.9	-58.3	0.5	-55.3	1.2	0.6	-56.4	-55.8
*******************************************************************************************************************************************************
RXN: TS1_2Me-formation (kcal/mol) DE_SPC	DE	DZPE	DH_SPC	T.DS	T.qh-DS	DG(T)_SPC	qh-DG(T)_SPC
*******************************************************************************************************************************************************
o 1Hindazole+Base+MeOPPh3	0	0	0	0	0	0	0	0
o dep_indazole+BaseH+MeOPPh3	-13.5	-15.8	0	-13.3	0.4	0.3	-13.7	-13.6
o TS1a_2Me+BaseH	-10.2	-14.3	-0.2	-9.8	-8.9	-12.1	-0.8	2.3
o 2Me_indazole+OPPh3+BaseH	-51.4	-53.5	0.3	-50.9	1.6	0.7	-52.5	-51.6
*******************************************************************************************************************************************************
